# Supplementary material for: Decreased fucosylation impacts epithelial integrity and increases risk for COPD
Source: PubMed Central journal article supplement — bioRxiv. 2023 Nov 2:2023.10.31.564805. Preprint. [Version 1] doi: 10.1101/2023.10.31.564805 (PMC10635007; doi:10.1101/2023.10.31.564805), 2023-11-02
Supplement: NIHPP2023.10.31.564805v1-supplement-1.pdf [file NIHPP2023.10.31.564805v1-supplement-1.pdf]

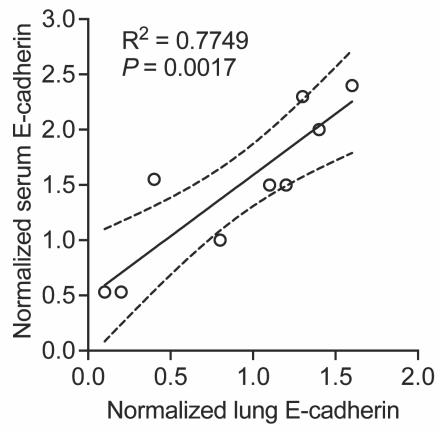

**SF1:** Serum levels of E-cadherin are highly correlated with lung levels of E-cadherin

### ECAD N-glycans m/z 1500-5000

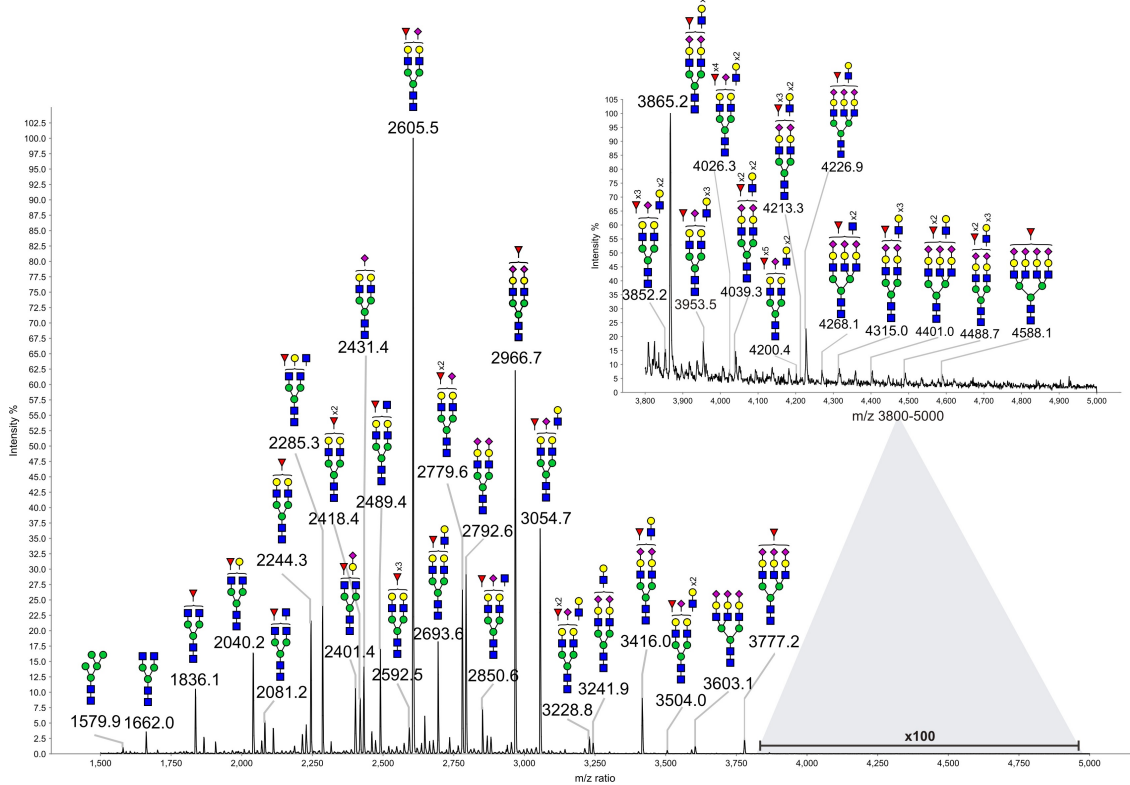

### ECAD FUT2 N-glycans m/z 1500-5000

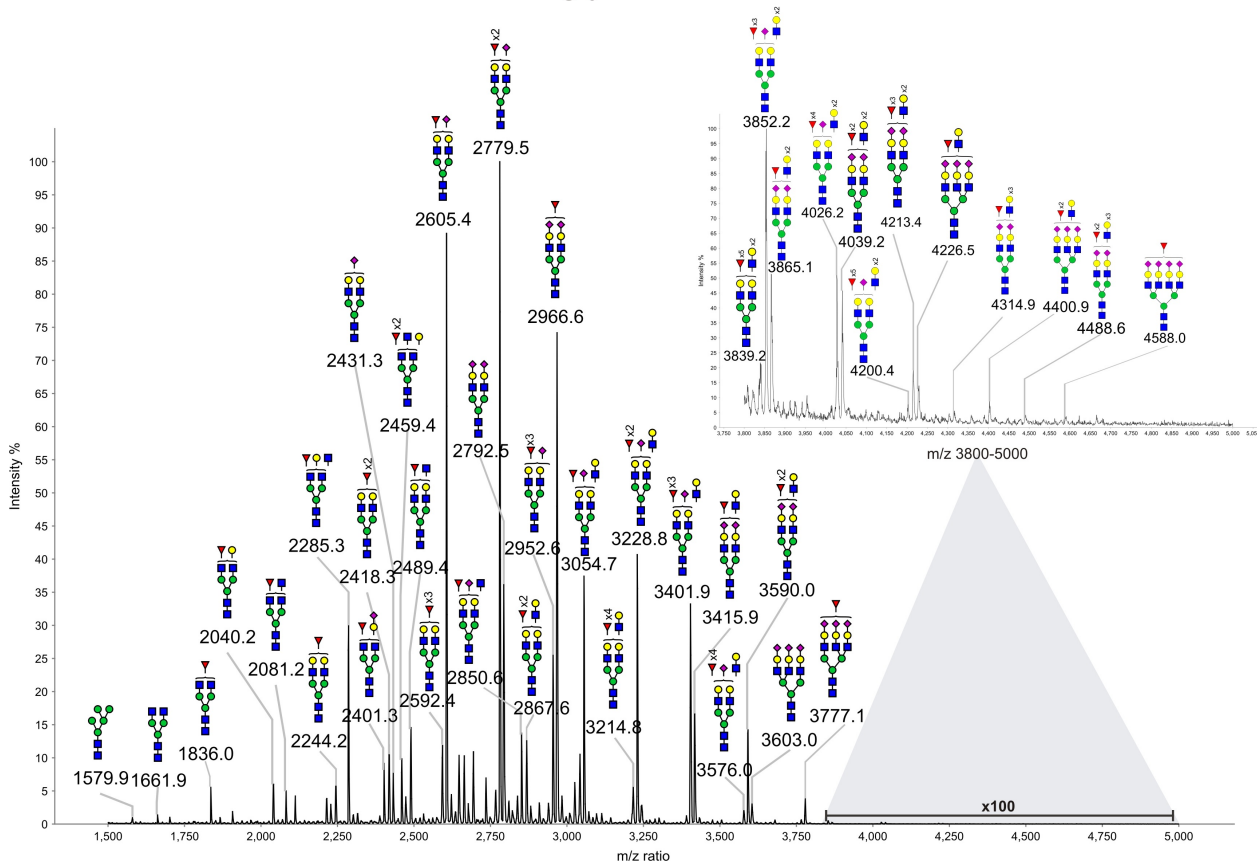

SF2: Glycan profiles of E-cadherin change with FUT2 overexpression

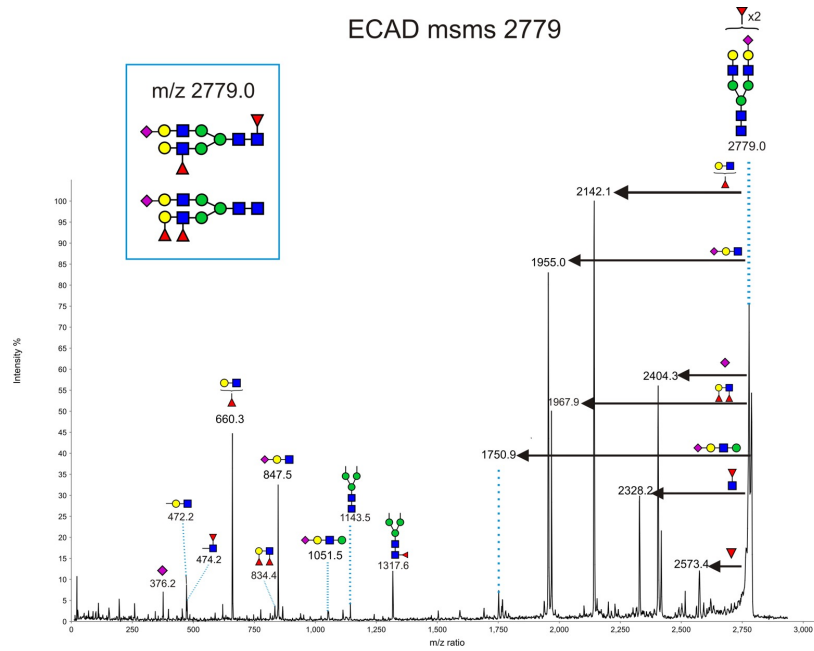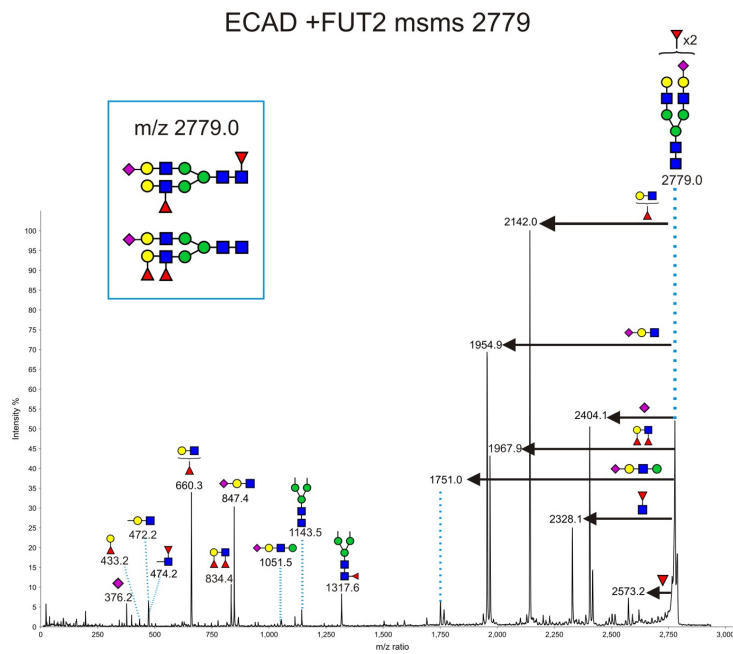

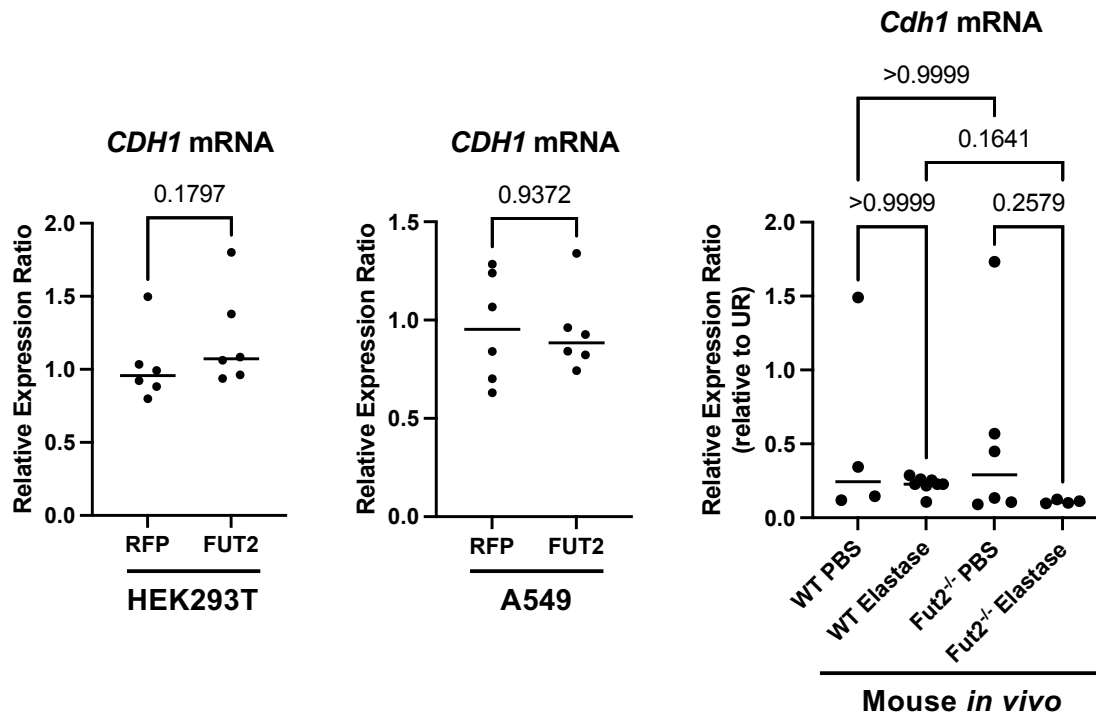

**SF3:** *CDH1* transcript levels are not dependent on *FUT2* expression.



**A**

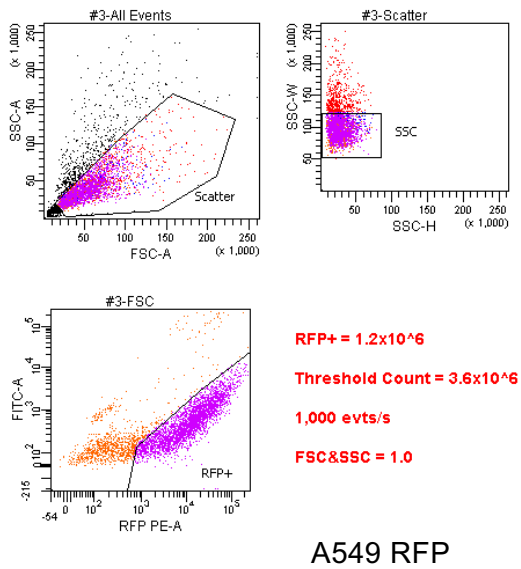

**B**

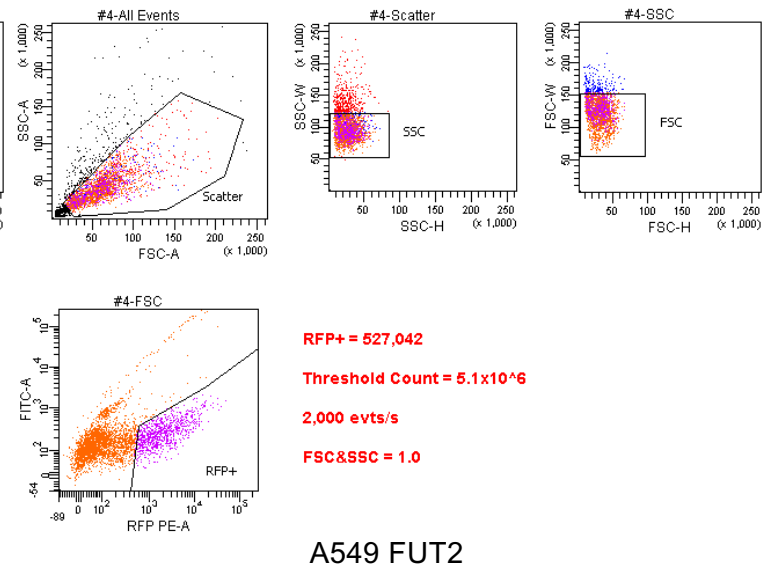

**C**

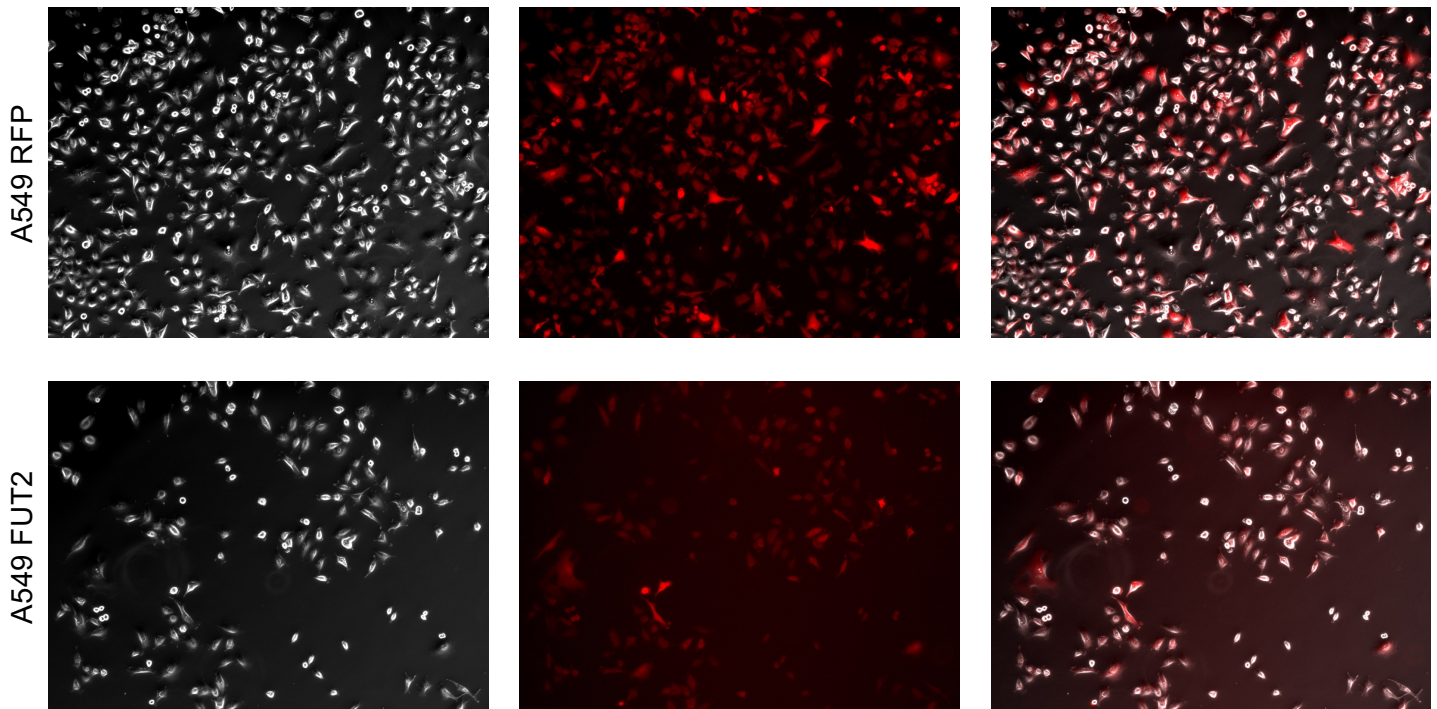

**D**

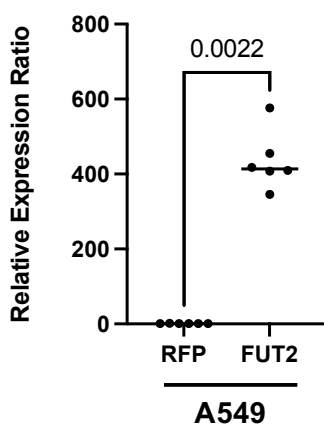

**SF4:** Transduction efficiency of RFP, FUT2, Fut2, shCTRL, shCDH1.

**E**

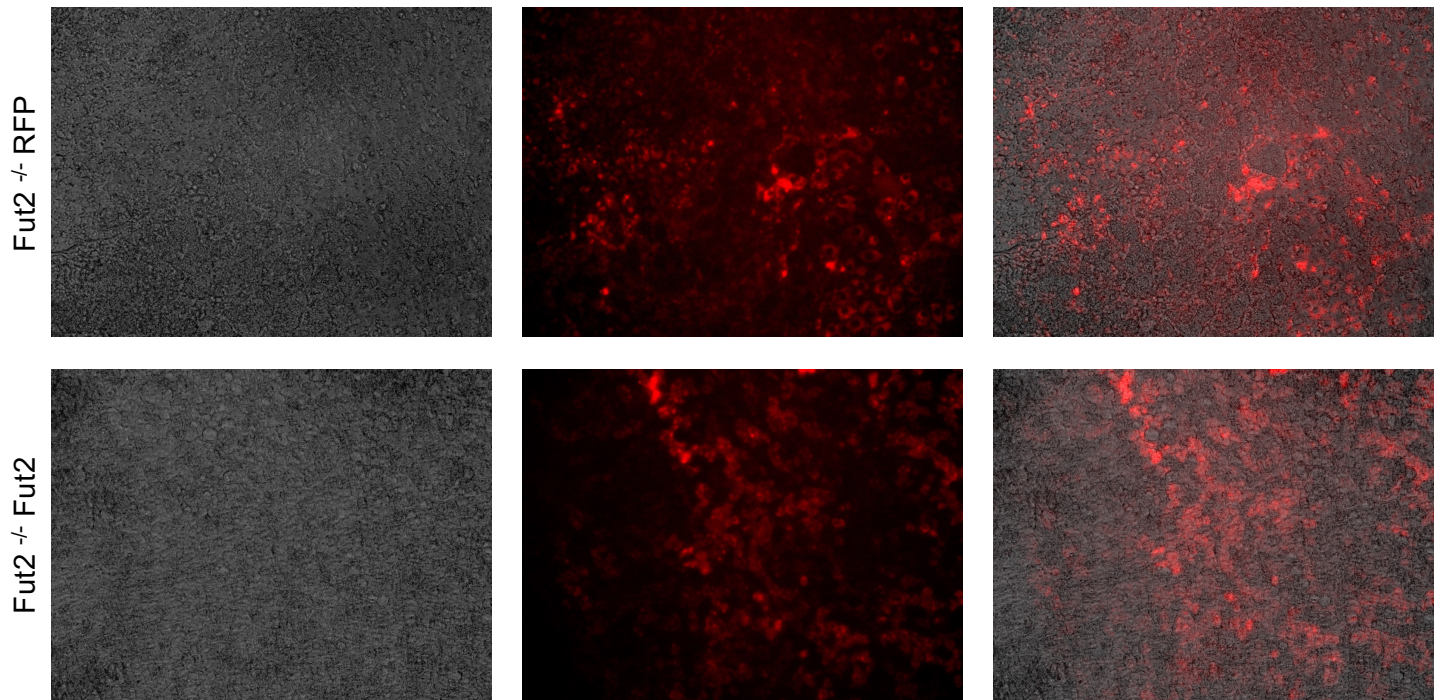

**SF4:** Transduction efficiency of RFP, FUT2, Fut2, shCTRL, shCDH1.



F

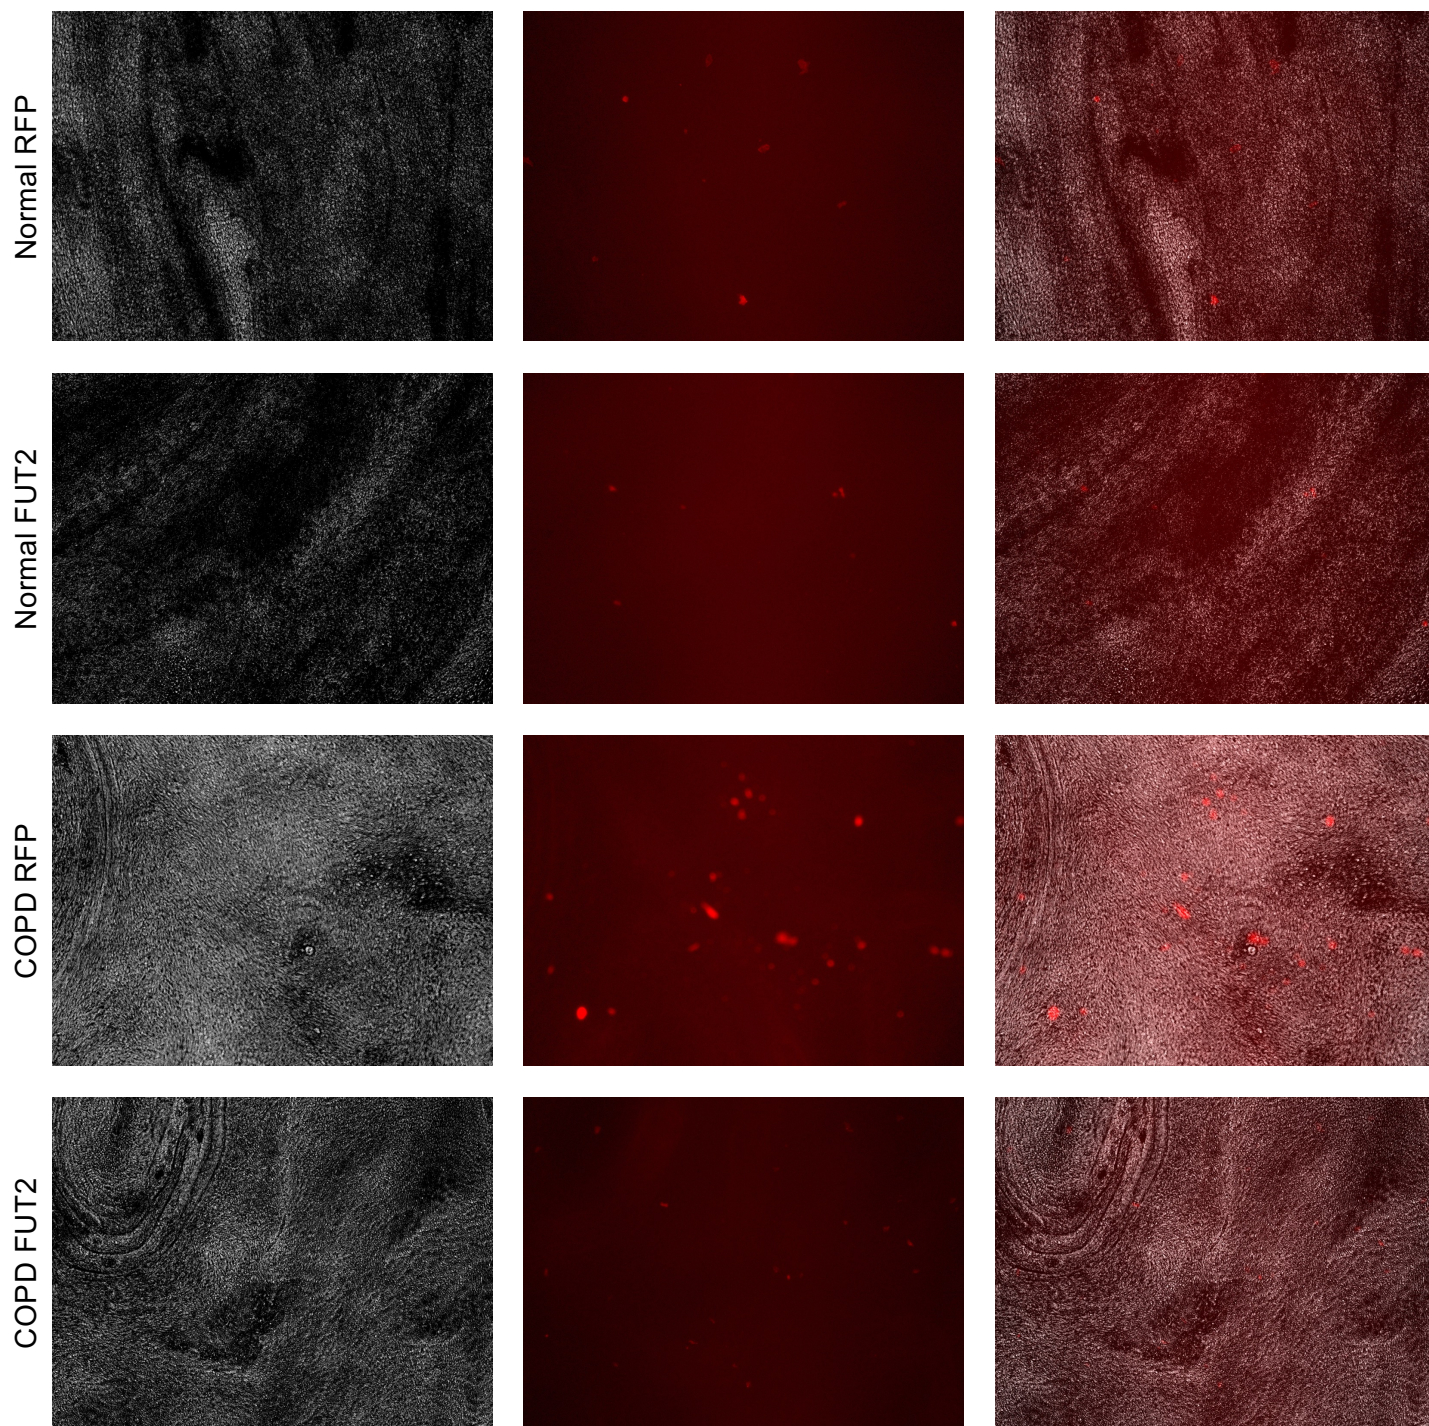



F

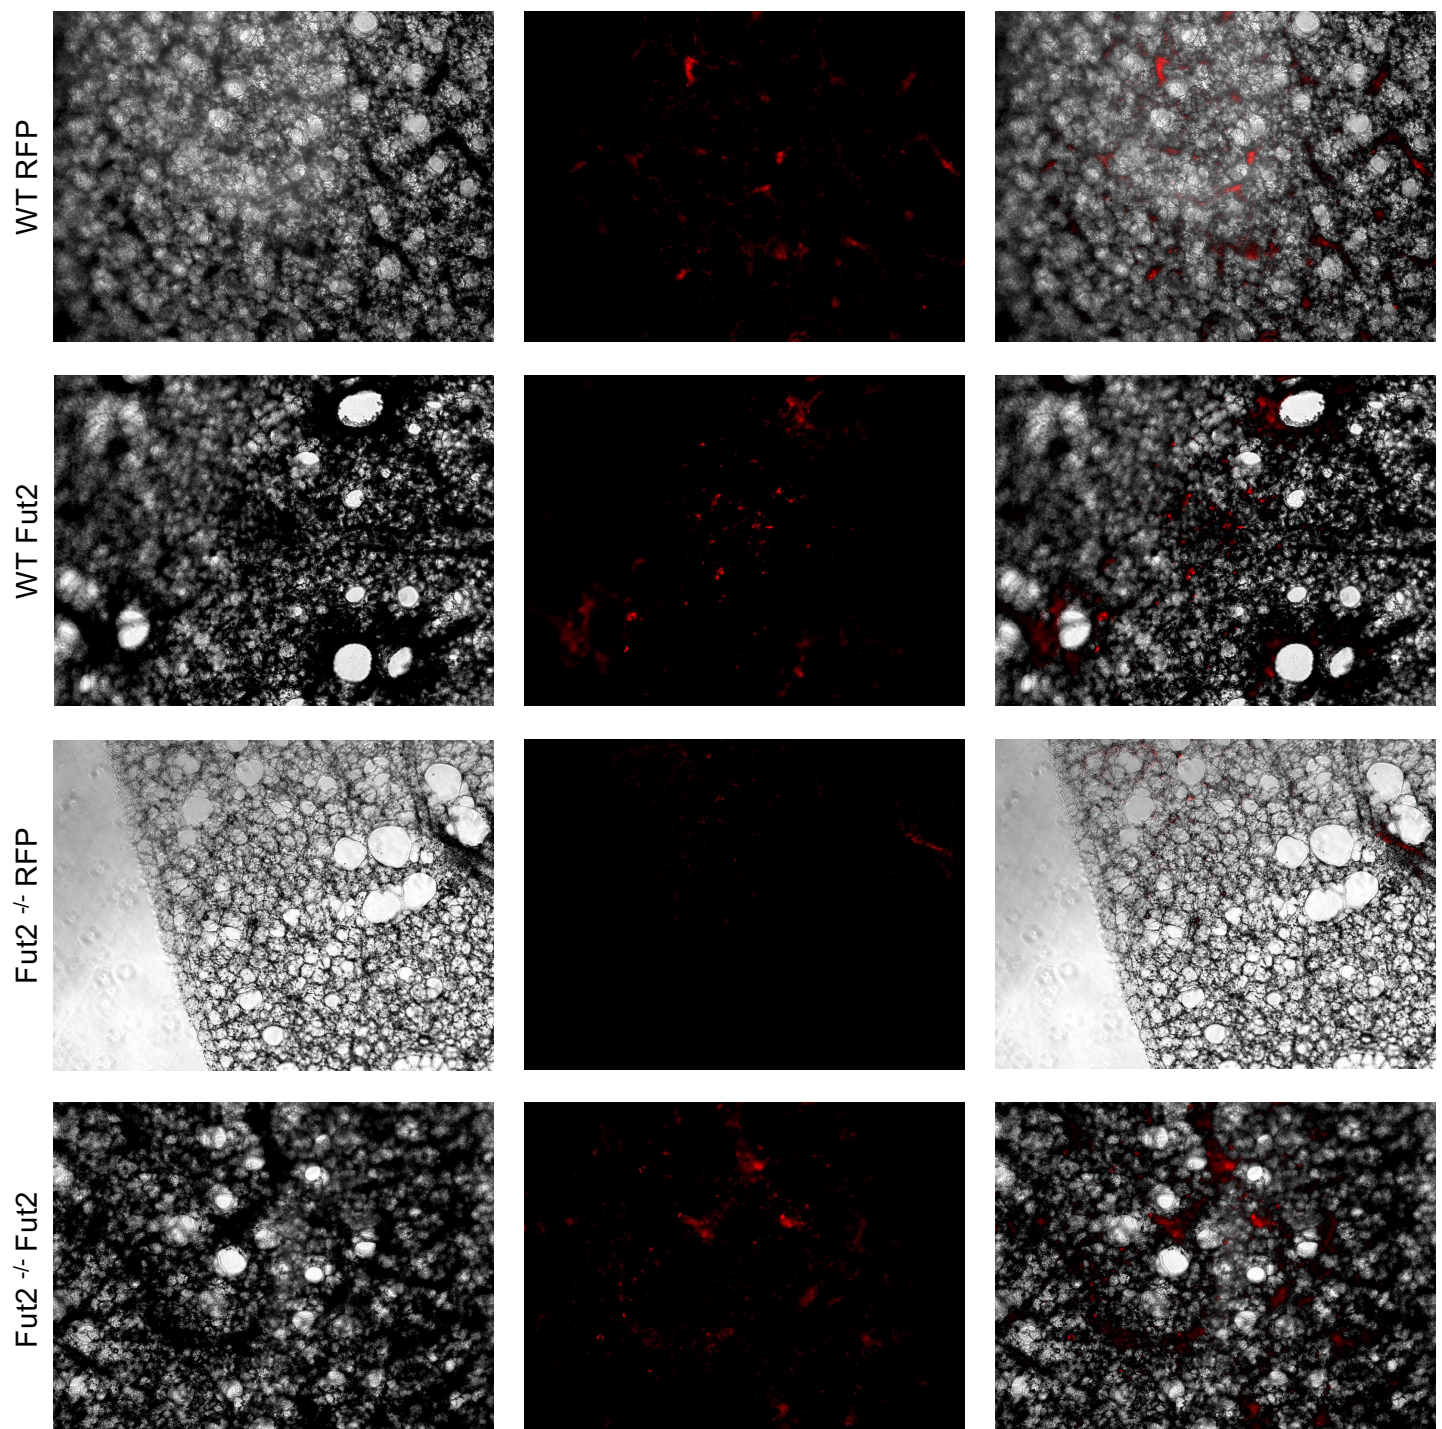

**SF4:** Transduction efficiency of RFP, FUT2, Fut2, shCTRL, shCDH1.

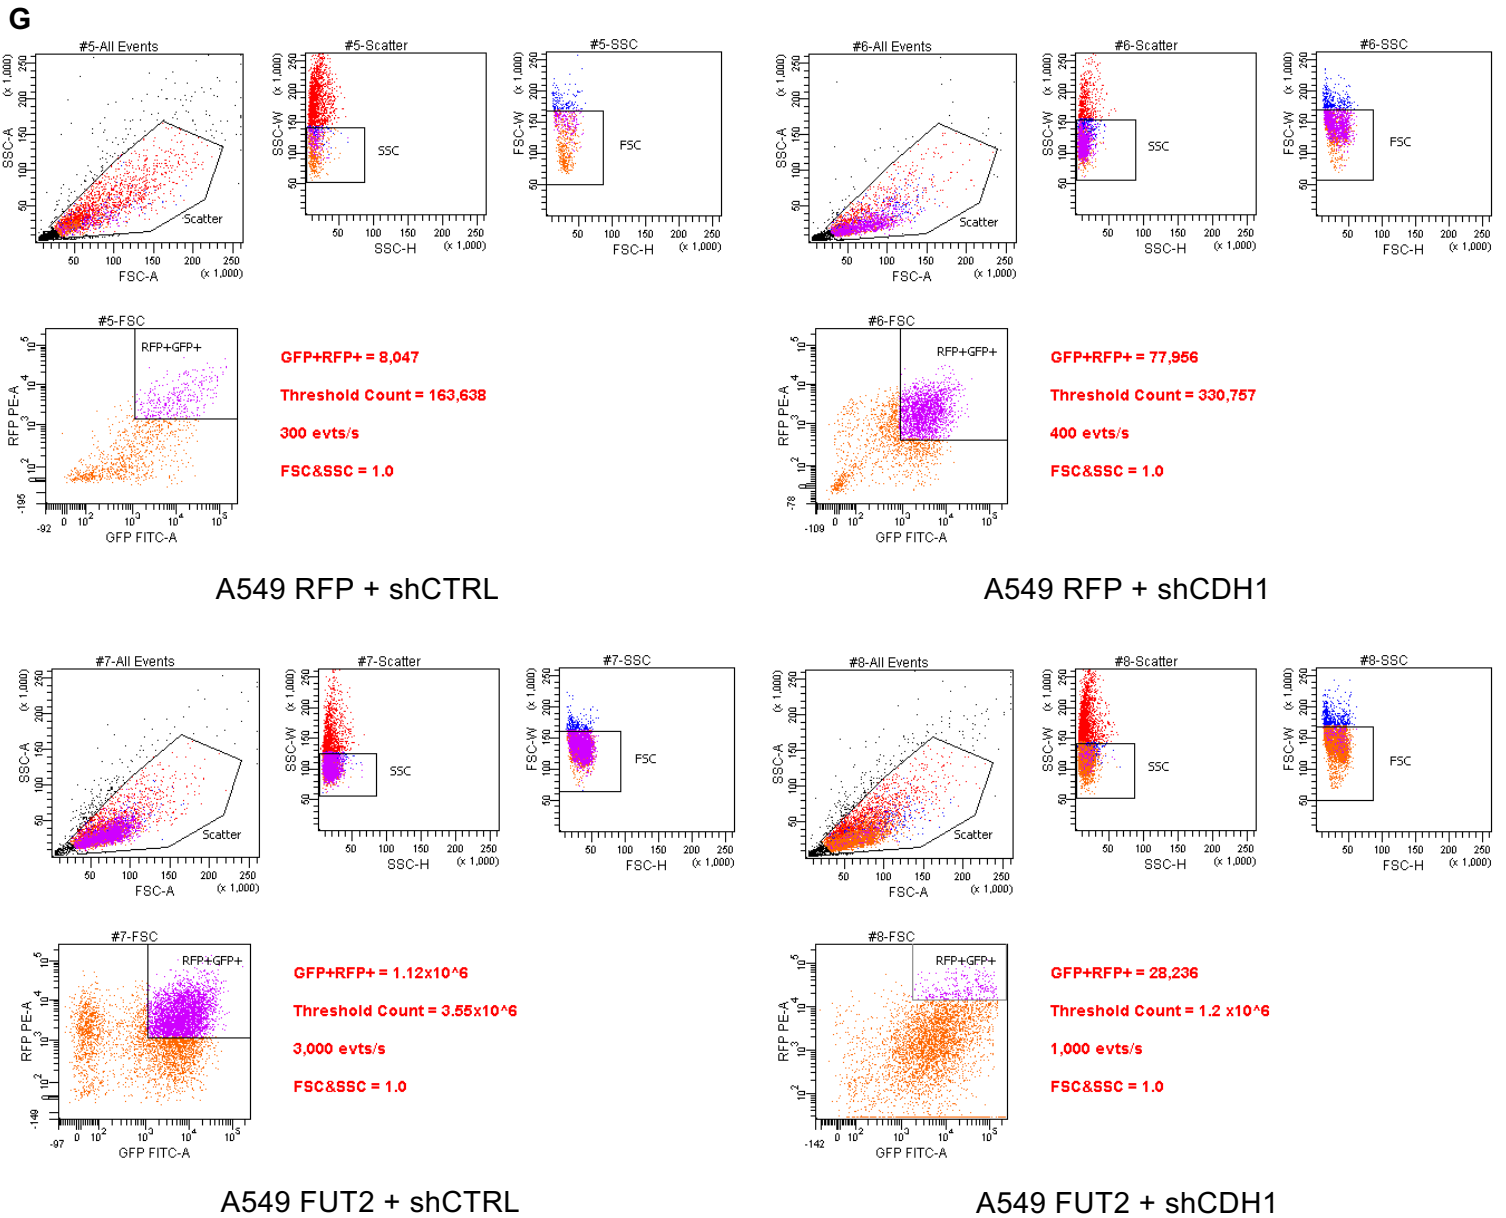

**SF4:** Transduction efficiency of RFP, FUT2, Fut2, shCTRL, shCDH1.

H

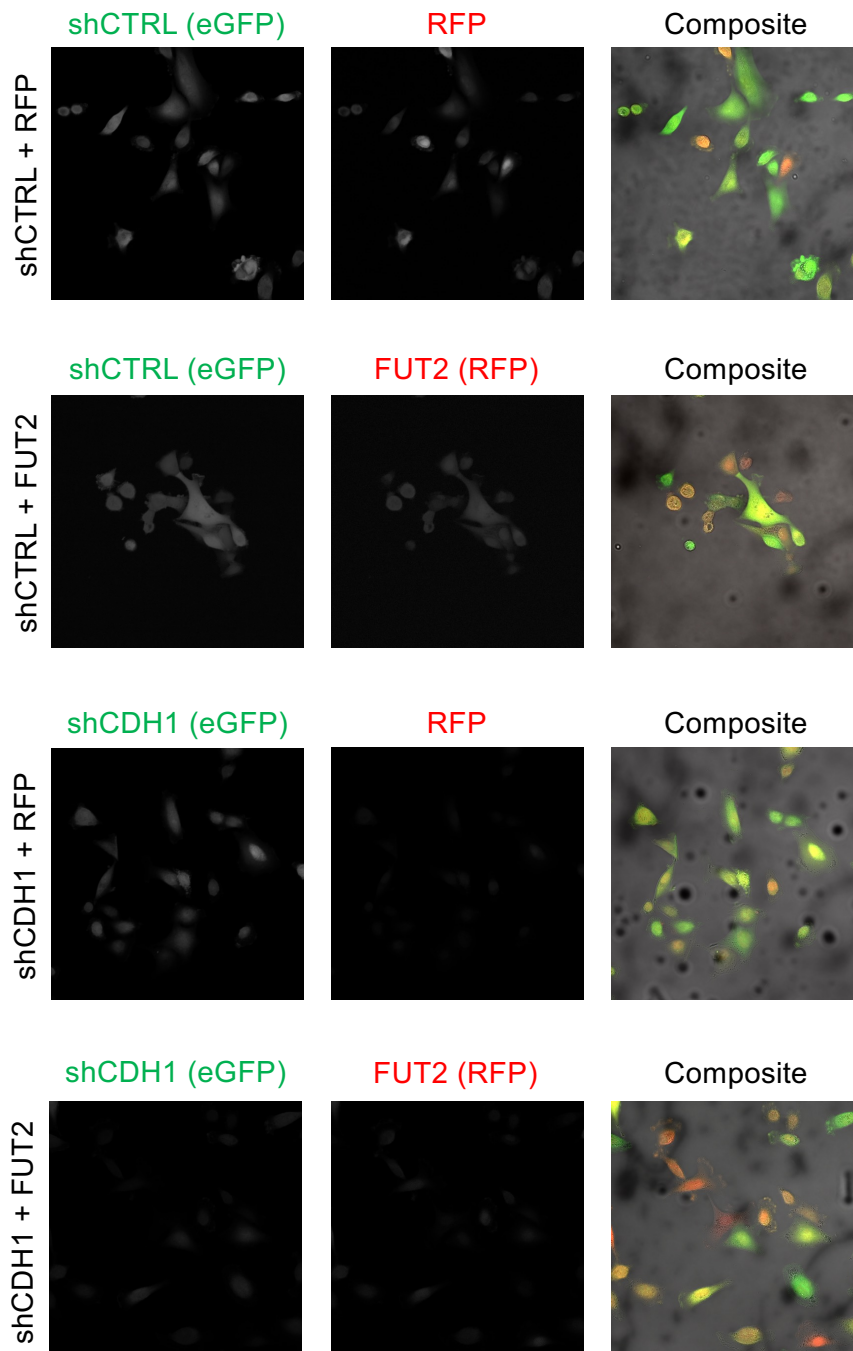

**SF4:** Transduction efficiency of RFP, FUT2, Fut2, shCTRL, shCDH1.

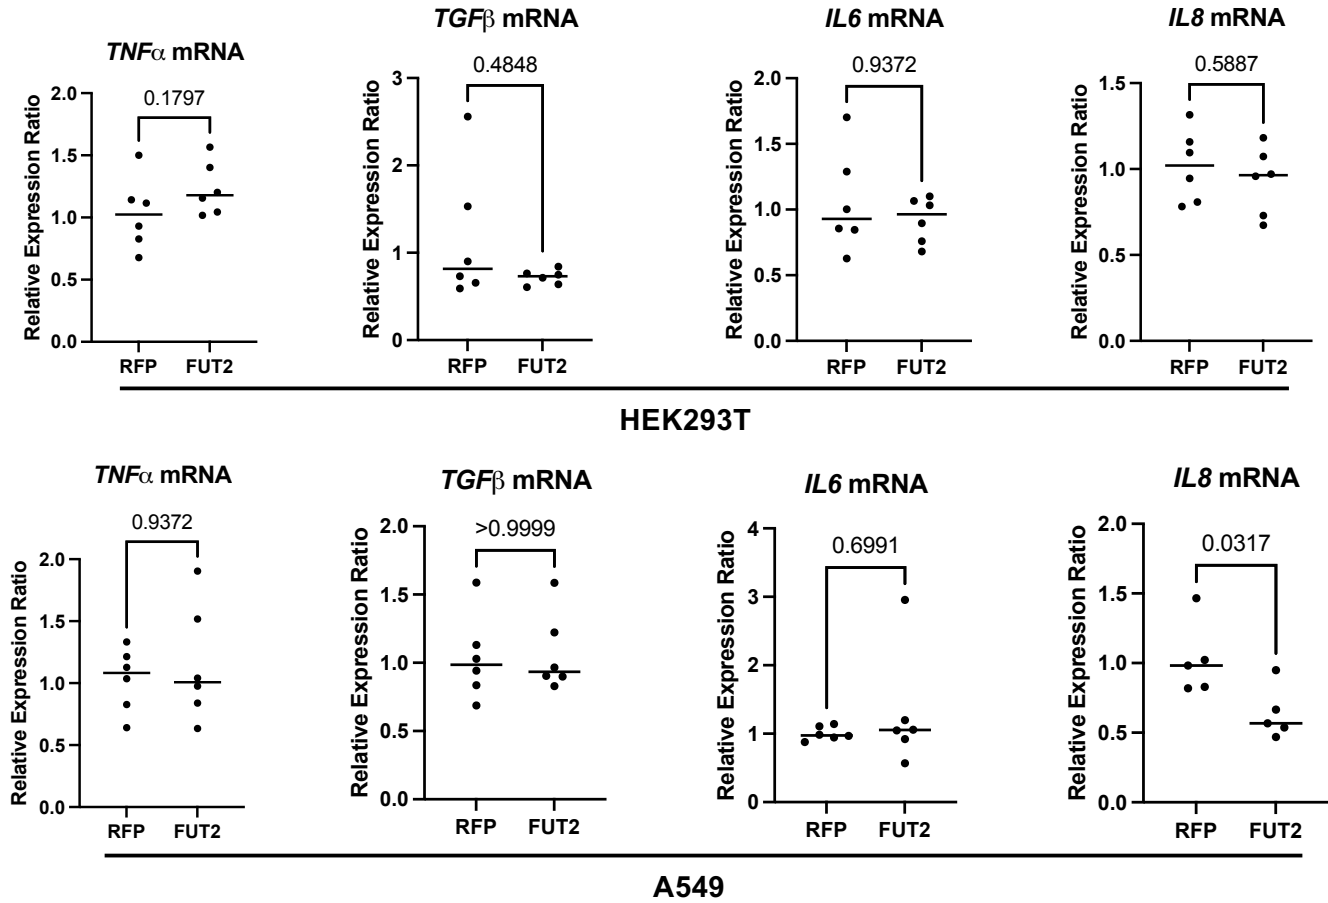

**SF4:** Markers of key inflammatory genes are not changed with varying FUT2 expression



| <b>Supplementary Table 1: Cohesion measurements of E-cadherin with and without FUT2 dependent fucosylation</b> |                     |     |
|----------------------------------------------------------------------------------------------------------------|---------------------|-----|
| <b>E-cadherin without FUT2 fucosylation</b>                                                                    |                     |     |
| Run                                                                                                            | Adhesive Force (nN) | n   |
| 1                                                                                                              | 63.759 ± 2.8563     | 96  |
| 2                                                                                                              | 63.428 ± 3.5936     | 97  |
| 3                                                                                                              | 63.0181 ± 2.9007    | 101 |
| 4                                                                                                              | 63.4037 ± 2.9181    | 102 |
| 5                                                                                                              | 63.6881 ± 2.3771    | 101 |
| <b>E-cadherin with FUT2 fucosylation</b>                                                                       |                     |     |
| Run                                                                                                            | Adhesive Force (nN) | n   |
| 1                                                                                                              | 79.5199 ± 2.5149    | 105 |
| 2                                                                                                              | 80.2063 ± 3.5990    | 121 |
| 3                                                                                                              | 80.2640 ± 2.6532    | 117 |
| 4                                                                                                              | 79.6411 ± 3.0411    | 116 |
| 5                                                                                                              | 79.3105 ± 2.0907    | 107 |

| <b>Supplementary Table 2: Quantitative polymerase chain reaction primers used to determine abundance of mRNA transcripts.</b> |           |                           |
|-------------------------------------------------------------------------------------------------------------------------------|-----------|---------------------------|
| Gene                                                                                                                          | Direction | Sequence (5' – 3')        |
| <b>Human</b>                                                                                                                  |           |                           |
| Human <i>CDH1</i>                                                                                                             | Forward   | GCCTCCTGAAAAGAGAGTGGAAAG  |
|                                                                                                                               | Reverse   | TGGCAGTGTCTCTCCAAATCCG    |
| Human <i>KRT5</i>                                                                                                             | Forward   | TTGGACCAGTCAACATCTCTGT    |
|                                                                                                                               | Reverse   | CTGCTACCTCCGGCAAGAC       |
| Human <i>FOXJ1</i>                                                                                                            | Forward   | AGATCCCACCTGGCAGAATTCAA   |
|                                                                                                                               | Reverse   | CCGAGGCACCTTTGATGAAGC     |
| Human <i>SCGB1A1</i>                                                                                                          | Forward   | TGAAACTCGCTGTCACCCTC      |
|                                                                                                                               | Reverse   | CAGATCTCTGCAGAAGCGGA      |
| Human <i>MUC5AC</i>                                                                                                           | Forward   | GAACTGCCAGTCTGCCTTT       |
|                                                                                                                               | Reverse   | AGCGTGTCCATTGTAGGTG       |
| Human <i>CLDN4</i>                                                                                                            | Forward   | ATCGGCAGCAACATTGTCCAC     |
|                                                                                                                               | Reverse   | GCGAGTCGTACACCTTGCAC      |
| Human <i>AGER</i>                                                                                                             | Forward   | CACCTTCTCCTGTAGCTTCAGC    |
|                                                                                                                               | Reverse   | AGGAGTACTGCTCCAGTCTCT     |
| Human <i>SFTPC</i>                                                                                                            | Forward   | GTCCTCATCGTCTGTTGATTG     |
|                                                                                                                               | Reverse   | AGAAGGTGGCAGTGGTAACCAG    |
| Human <i>FUT2</i>                                                                                                             | Forward   | CTACCACCTGAACGACTGGATG    |
|                                                                                                                               | Reverse   | AGGAGTACTCCTGGAGGATCT     |
| Human <i>GAPDH</i>                                                                                                            | Forward   | GTCTCCTCTGACTTCAACAGCG    |
|                                                                                                                               | Reverse   | ACCACCTGTTGCTGTAGCCAA     |
| Human <i>TNFα</i>                                                                                                             | Forward   | TGGGATCATTGCCTGTGAG       |
|                                                                                                                               | Reverse   | GGTGTCTGAAGGAGGGGTA       |
| Human <i>TGFβ</i>                                                                                                             | Forward   | GTGGAAACCCACAACGAAATC     |
|                                                                                                                               | Reverse   | GAGAGCAACACGGGTTCCAGG     |
| Human <i>IL6</i>                                                                                                              | Forward   | CCACCGGGAACGAAAGAGAA      |
|                                                                                                                               | Reverse   | CTTGTACATGTTTGTGGAGAAGGA  |
| Human <i>IL8</i>                                                                                                              | Forward   | TGGACCCCAAGGAAAAGTGG      |
|                                                                                                                               | Reverse   | ATTTGCTTGAAGTTTCACTGGCA   |
| <b>Mouse</b>                                                                                                                  |           |                           |
| Mouse <i>Cdh1</i>                                                                                                             | Forward   | GGTCATCAGTGTGCTCACCTCT    |
|                                                                                                                               | Reverse   | GCTGTTGTGCTCAAGCCTTCAC    |
| Mouse <i>Krt5</i>                                                                                                             | Forward   | AGATGTTCTTTGATCGGGAGC     |
|                                                                                                                               | Reverse   | TGTCCATGGAAGGACCACAG      |
| Mouse <i>Foxj1</i>                                                                                                            | Forward   | TCGAGCTGGGACAGAGAA        |
|                                                                                                                               | Reverse   | CGAATGTGAGGCCTGGCT        |
| Mouse <i>Scgb1a1</i>                                                                                                          | Forward   | TCCCTGAAGCCTTTCAACCC      |
|                                                                                                                               | Reverse   | TTGTTAGGATTTTCTCCGTGAGC   |
| Mouse <i>Muc5ac</i>                                                                                                           | Forward   | TTACTCTACTGACTGCACCAACACA |
|                                                                                                                               | Reverse   | CCCATGTAAGTGTACTGCC       |
| Mouse <i>Cldn4</i>                                                                                                            | Forward   | CGAGCCCTTATGGTCATCAGCA    |
|                                                                                                                               | Reverse   | ATGCTTGCCACGATGAACACGG    |
| Mouse <i>Ager</i>                                                                                                             | Forward   | GCCACTGGAATTGTCGATGAGG    |
|                                                                                                                               | Reverse   | GCTGTGAGTTTCAAGGCAGGAT    |
| Mouse <i>Sftpc</i>                                                                                                            | Forward   | GTCCTCGTTGTCGTGGTATTG     |
|                                                                                                                               | Reverse   | AAGGTAGCGATGGTGTCTGCTC    |
| Mouse <i>Fut2</i>                                                                                                             | Forward   | AGGCGGTTCAAATGTCTCACC     |
|                                                                                                                               | Reverse   | GCATATTCGCCATCTGGTTCC     |
| Mouse <i>Gapdh</i>                                                                                                            | Forward   | CATCACTGCCACCCAGAAGACTG   |
|                                                                                                                               | Reverse   | ATGCCAGTGAGCTTCCCCTTCAG   |

| <b>Supplementary Table 3: Primers used to amplify genes with polymerase chain reaction from genomic cDNA.</b> |           |                                                               |
|---------------------------------------------------------------------------------------------------------------|-----------|---------------------------------------------------------------|
| Gene                                                                                                          | Direction | Sequence (5' – 3')                                            |
| Human <i>FUT2</i>                                                                                             | Forward   | GTACGATATCATGTACCCATACGATGTTCCAGATTACGCTCTGGTCGTTCA<br>GATGCC |
|                                                                                                               | Reverse   | GTACGATATCTTAGTGCTTGAGTAAGGGGGACAGGTCTGC                      |
| Mouse <i>Fut2</i>                                                                                             | Forward   | TATAGATATCATGTACCCATACGATGTTCCAGATTACGCTGCGAGTGCCC<br>AGGTA   |
|                                                                                                               | Reverse   | AAAAGATATCTTAGTGCTTAAAGGAGTG                                  |
